# Supplementary material
Source: HighWire-hosted journal article supplement (https://www.cmajopen.ca/highwire/filestream/81341/field_highwire_adjunct_files/3/2020-0010-original-submission.pdf)
Supplement: 2020-0010-original-submission.pdf [file 2020-0010-original-submission.pdf]

**Title:**

Where are we with pediatric drug data in Canadian drug monographs? A descriptive analysis

**Authors and degrees:**

Preeya Raja<sup>1</sup> MSc PharmD, Mark Duffett<sup>2</sup> PharmD PhD, Maryann Mazer-Amirshahi<sup>3</sup> PharmD MD MPH, Ashaka Patel<sup>4</sup> BHSc, Andrea Gilpin<sup>5</sup> PhD, MBA, Catherine Litalien<sup>5</sup> MD, Anthony K Chan<sup>6</sup> MD, John van den Anker<sup>7,8</sup> MD PhD, Thierry Lacaze-Masmonteil<sup>9</sup> MD PhD, Samira Samiee-Zafarghandy<sup>10</sup> MD

**Author Affiliations:**

- 1 Department of Pharmacy, Hamilton Health Sciences, Hamilton, Ontario, Canada.
- 2 Department of Pediatrics, McMaster University, Hamilton, Ontario, Canada.
- 3 Department of Emergency Medicine, MedStar Washington Hospital Center, Washington, DC, United States.
- 4 Faculty of Health Sciences, McMaster University, Hamilton, Ontario, Canada
- 5 The Rosalind & Morris Goodman Family Pediatric Formulations Centre of the Sainte-Justine University Hospital Center, Montreal, Quebec, Canada.
- 6 Division of Pediatric Hematology/Oncology, McMaster Children's Hospital, McMaster University, Hamilton, Ontario, Canada.
- 7 Division of Clinical Pharmacology, Department of Pediatrics, Children's National Health System, Washington, District of Columbia, United States.
- 8 Division of Paediatric Pharmacology and Pharmacometrics, University of Basel Children's Hospital, Basel, Switzerland.
- 9 Division of Neonatology, Department of Pediatrics, University of Calgary, Alberta Children's Hospital, Alberta, Canada.
- 10 Division of Neonatology, Department of Pediatrics, McMaster Children's Hospital, McMaster University, Hamilton, Ontario, Canada.

**Acknowledgements:**

Ayfer Karaokcu, Victor Lam, Natalie Tchakerian, Grace Xu

**Correspondence to:**

Samira Samiee-Zafarghandy, [samiees@mcmaster.ca](mailto:samiees@mcmaster.ca)

**Funding statement and declaration of authors' competing interests:**

The authors received no financial support for the research, authorship, and/or publication of this article, and report no conflicts of interest in this work.

## Abstract

**BACKGROUND:** Optimal drug therapy in children relies on the availability of pediatric-specific information. European and American legislative initiatives have resulted in the increase in evidence-based pediatric pharmacotherapy data. In Canada, there is no comparable initiatives in place and hence we aimed to describe the quality and quantity of pediatric information in monographs of new drugs approved by Health Canada.

**METHODS:** The most updated Canadian drug monographs of all new drugs approved by Health Canada from January 2007 until December 2016 were systematically reviewed. We excluded drugs that were withdrawn from the Canadian market.

**RESULTS:** During this study period, Health Canada approved 281 drugs, 275 of which met our inclusion criteria. Pediatric-specific information and indication were present in 128 (47%) and 76 (28%) of the drug monographs respectively. Only 15 (10%) of all oral drugs were available in child-friendly, age-appropriate dosage forms. The majority of the monographs (228, 83%) were revised in the most recent three years (2016-2018). Of all pediatric age groups, neonates had the lowest number of indications listed in the product monographs (11, 4%).

**INTERPRETATION:** The majority of new drugs approved by Health Canada do not contain pediatric or neonatal information in their product monographs and therefore are used "off-label". Canadian children are in need of regulatory mechanisms to promote neonatal and pediatric drug development, and also enhance the submission of pediatric data, by manufacturers, from other jurisdictions. All of which will contribute to safe and effective neonatal and pediatric pharmacotherapy for Canadian children.

## Introduction

Optimizing pharmacotherapy in children has been the goal of many American and European governmental legislative initiatives. These initiatives have been introduced to mandate or provide incentives for pharmaceutical companies to conduct studies to assess the safety and efficacy of drugs in the pediatric population, and provide equally rigorous therapeutic information for children as their adult counterparts.<sup>1-3</sup> In the US, the Best Pharmaceuticals for Children Act (BPCA) (2002) and the Pediatric Research Equity Act (PREA) (2003) are some of the legislations that have established incentives and requirements to encourage pediatric drug development. The Food and Drug Administration Safety and Innovation Act (FDASIA) (2012) made the BPCA and PREA into law, with amendments such as a requirement for submission of pediatric study plans by pharmaceutical companies. More recently, in 2017, the Food and Drug Administration Reauthorization Act (FDARA) was signed into law, to facilitate the development and approval of drugs and devices for pediatric populations.<sup>4</sup> In the European Union, the Pediatric Regulation came into force in 2007, and aimed to stimulate the development of pediatric medicines.<sup>5-6</sup> These regulatory initiatives have resulted in pediatric drug trials, with subsequent labeling changes for new and expanded pediatric indications and other safety and efficacy pediatric data.<sup>7</sup>

An increasing gap exists between Canada and other global leaders concerning the advancement in pediatric drug development.<sup>8-9</sup> In Canada, the only legislative initiative to include children in drug development, the Pediatric Extension, was implemented in 2006.<sup>10</sup> This regulation applies for innovative drugs only, and grants a six-month extension to the eight-year period of data protection to manufacturers upon

1  
2  
3 the provision of pediatric pharmacotherapy evidence within the first five years of drug  
4 approval.<sup>10</sup> Considering the lack of regulatory initiatives which potentially impede the  
5 availability of evidence-based drug therapy for Canadian children,<sup>7,11</sup> we aim to  
6  
7 characterize the current availability of pediatric-specific data and dosing information in  
8  
9 Canadian monographs of new drugs approved between 2007 and 2016.  
10  
11  
12  
13

## 14 **Methods**

15  
16  
17 This study was an analysis of publicly available information in Canadian drug  
18 monographs. We identified new active substances (NASs) approved by Health Canada  
19 between January 1, 2007 and December 31, 2016 using the Annual Drug Submission  
20 Performance reports. NASs represent new chemicals or biological substances that have  
21 not previously been approved for sale as a drug in Canada. We excluded NASs that  
22 were withdrawn from the Canadian market. Next, we obtained the most recent versions  
23 of drug monographs from Health Canada's Drug Product Database ([https://health-  
24 products.canada.ca/dpd-bdpp/](https://health-products.canada.ca/dpd-bdpp/)). We reviewed each monograph for the availability and  
25 quality of pediatric-specific clinical and dosing information, specifically the presence of  
26 pediatric indications, dosing, safety, and pharmacokinetic data, and the availability of  
27 pediatric-friendly oral dosage forms (Supplement 1).  
28  
29  
30  
31  
32  
33  
34  
35  
36  
37  
38  
39  
40  
41

42 We defined a pediatric indication as an approved use in populations younger  
43 than 18 years of age. We defined pediatric information as the presence of any data  
44 pertaining to the use of a particular medication in children (such as information from  
45 studies performed in children) and defined safety information as pediatric-specific  
46 warnings, contraindications or adverse effects. We considered oral liquids, granules, or  
47 dispersible or chewable tablets formulated specifically for pediatric use to be pediatric-  
48  
49  
50  
51  
52  
53  
54  
55  
56  
57  
58  
59  
60

1  
2  
3 friendly oral dosage forms. We used the Anatomical Therapeutic Chemical (ATC)  
4 classification system to categorize each NAS based on the drug's primary indication  
5 and mechanism of action. For monographs that included pediatric data, we recorded the  
6 type of study from source of the data with regard to the study design and population.  
7  
8  
9  
10  
11

12 Four independent reviewers extracted the data and entered it into a REDCap  
13 database. To ensure accuracy of the collected data, one investigator checked the first  
14 ten drugs reviewed by each abstractor and a random sample (10%) of all remaining  
15 drugs. We reported data as counts and percentages and means and standard  
16 deviations in all NASs and subgroups of non-biologic and biologic drugs.  
17  
18  
19  
20  
21  
22

## 23 **Results**

24  
25  
26 Health Canada approved a total of 281 new drugs between 2007 and 2016. We  
27 included 275 of these drugs, excluding two with the same medicinal ingredient  
28 (nitisinone), and four that were withdrawn from the Canadian market (ezogabine,  
29 sitaxsentan, daclizumab, and idebenone). The years with the lowest and highest  
30 number of approvals were 2008 and 2013, with 16 and 40 drug approvals, respectively.  
31  
32  
33  
34  
35  
36  
37

38 Of all monographs, 271 (98%) listed an adult indication. The four with only  
39 pediatric indications were three biological products (two vaccines [pneumococcal  
40 polysaccharide conjugate vaccine 10-valent adsorbed and human rotavirus live  
41 attenuated oral vaccine] and one allogenic stem cell therapy [remestemcel-L]) and one  
42 drug for treatment of attention deficit hyperactivity disorder (guanfacine).  
43  
44  
45  
46  
47  
48

49 NASs belonged to 18 different therapeutic classes (Table 1). The classes with  
50 the greatest number of drugs were oncology, infectious disease, and hematology (Table  
51 1). The routes of administration were oral (144, 52%), intravenous (108, 39%), and  
52  
53  
54  
55  
56  
57  
58  
59  
60

1  
2  
3 topical (23, 8%). At the time of data abstraction, 253 (92%) NAS monographs had been  
4  
5 revised since original drug approval, with the large majority (228, 90%) being revised  
6  
7 between 2016 and 2018.  
8  
9

10 Pediatric information, including pediatric-specific indications, dosing, or safety  
11  
12 information, was available in 128 (47%) of all drug monographs. Pediatric indications  
13  
14 were listed in 76 (28%) of all monographs. The four therapeutic classes with the highest  
15  
16 proportion of drugs with pediatric indications were infectious disease (47%),  
17  
18 allergy/immunology (43%), endocrine/metabolic (40%), and hematology (39%). None of  
19  
20 the drugs in anesthesia/analgesia, dermatology, or urology had pediatric indications  
21  
22 (Table 1). Furthermore, no pediatric indication was included in the monographs of drugs  
23  
24 approved for critical conditions such as pulmonary arterial hypertension, diabetes,  
25  
26 hepatitis C, and invasive systemic infections (Table 2). All monographs with pediatric  
27  
28 indications provided pediatric dosing recommendations; however, the majority of the  
29  
30 pediatric indications and dosing information pertained to the 12 to 17 years of age (68,  
31  
32 24%) and decreased by age with only 10 (4%) and 1 (<1%) of monographs providing  
33  
34 indication and dosing recommendations for term and preterm infants (Figure 1). Only 15  
35  
36 (10%) of the 144 drugs with oral dosage forms were available in a child-appropriate oral  
37  
38 formulation.  
39  
40  
41  
42  
43

44 Pediatric-specific safety information was included in 98 (36%) of all drug  
45  
46 monographs. Specifically, pediatric-specific adverse effects, warnings and  
47  
48 contraindications were present in 76 (28%), 64 (23%), and 14 (5%) monographs,  
49  
50 respectively. The source of pediatric information was from studies in exclusively  
51  
52 pediatric populations (73, 57%), mixed pediatric and adult populations (35, 27%),  
53  
54  
55  
56  
57  
58  
59  
60

1  
2  
3 animals (13,10%) and studies on different drugs in the same class (7, 5%). Additionally,  
4  
5 in one drug monograph, pediatric information was based on studies exclusively in  
6  
7 adults.  
8  
9

10 Of all NASs, 203 (74%) were non-biologics. In this subgroup of non-biologic  
11  
12 drugs, 84 (41%) and 41 (20%) monographs contained pediatric information and  
13  
14 indication(s), respectively. The safety information and pediatric-friendly oral formulation  
15  
16 were similar to the total NASs (32% and 7% respectively). Availability of dosing  
17  
18 information for different pediatric age groups also followed the same pattern as the total  
19  
20 NASs (Figure 1). Of the 72 biologic medicinal products, 35 (49%) included a pediatric  
21  
22 indication in their most recent labeling, out of which 9 (26%) were vaccines. The non-  
23  
24 vaccines biologic medicinal products with pediatric indications belonged to hematology  
25  
26 (n= 9), infectious diseases (n=6), endocrine/metabolic (n=5) and oncology (n=3).  
27  
28  
29

30  
31 The annual percentage of drugs with pediatric indications listed in the most  
32  
33 recent drug monographs, did not show any clear pattern of improvement over the 10-  
34  
35 year period of the study (Figure 2).  
36  
37

### 38 **Interpretation**

39  
40 Our findings demonstrate that only one in four drugs approved by Health Canada  
41  
42 over a recent 10-year period contain a pediatric indication in their most recent  
43  
44 monographs and less than 50% include any pediatric information. Furthermore, when a  
45  
46 drug was found to have a pediatric indication along with dosing information, it was most  
47  
48 often for the adolescent age group (12-17 years), leaving behind children, infants, and  
49  
50 neonates.  
51  
52  
53  
54  
55  
56  
57  
58  
59  
60

1  
2  
3 Our study reviewed the available data in the most updated monographs of the  
4 included drugs with the vast majority of the monographs being updated within the past  
5 three years. We did not observe any clear pattern of improvement for the presence of  
6 pediatric indications in the newly approved drugs, reflecting either the lack of pediatric  
7 efficacy and safety data or failure from manufacturers to submit to Health Canada  
8 existing pediatric information available in other jurisdictions. Both underline the  
9 importance of a Canadian regulatory framework that requires and incentivizes  
10 manufacturers to provide pediatric evidence for any drug with potential use in children,  
11 and also the need for a Canadian research environment that supports pediatric drug  
12 trials.  
13  
14  
15  
16  
17  
18  
19  
20  
21  
22  
23  
24  
25

26 Our study included new drugs approved after the implementation of Health  
27 Canada's market-exclusivity regulation, with the majority of included drugs having  
28 between three to a full five years for provision of pediatric information. The observed  
29 consistent lack of pediatric data emphasizes that this market exclusivity incentive is  
30 insufficient by itself in Canada's small pediatric market to promote availability of  
31 pediatrics data.  
32  
33  
34  
35  
36  
37  
38  
39

40 Since the first pediatric drug development regulatory initiative by the US FDA in  
41 1997, over 1200 pediatric studies have been submitted to the FDA and 700 drug labels  
42 have been revised.<sup>2</sup> We observed only 76 of drug monographs, with a pediatric  
43 indication, in Health Canada approved drugs over a recent 10-year period. For almost  
44 all drugs with pediatric indications, there was an overlapping adult indication, reinforcing  
45 the available evidence that new drug approvals are mainly driven by the adult  
46 commercial opportunity<sup>12</sup>, leaving Canadian children as therapeutic orphans. We  
47  
48  
49  
50  
51  
52  
53  
54  
55  
56  
57  
58  
59  
60



1  
2  
3 avoided excluding any drug based on presumption of adult only indication. We chose  
4  
5 this approach as evidence has shown many pediatric conditions are treated with  
6  
7 medications developed for adults with completely different indications and that in  
8  
9 conditions like adult malignancies, considering a drug's molecular mechanism of action,  
10  
11 rather than indication, may accelerate drug development in pediatrics.<sup>13</sup> The RACE for  
12  
13 Children Act by the FDA, which will come into force in 2020, was signed into law with  
14  
15 the aim to promote the development of new anticancer drugs for children.<sup>14</sup> The RACE  
16  
17 Act mandates that molecular entities need to be reviewed for the pediatric applicability  
18  
19 through their molecular target and the biology of pediatric malignancies rather than the  
20  
21 pediatric relevance of their adult indication.<sup>13-14</sup>  
22  
23  
24  
25

26 Our findings show despite clear advancement in therapeutic options for critical  
27  
28 conditions like invasive systemic fungal infections, hepatitis C, methicillin-resistant *S.*  
29  
30 *aureus* infections, pulmonary hypertension, or psychotic disorders for adults, only a few  
31  
32 of these newly approved therapeutics contained pediatric indications and none had any  
33  
34 neonatal information. This finding is concerning as such health conditions are  
35  
36 associated with major morbidity and death and also financial burden on neonatal and  
37  
38 pediatric health care.<sup>15</sup>  
39  
40  
41

42 There is evidence for a systematic delay in submission of new drugs to Health  
43  
44 Canada, up to two years, as compared to regulatory authorities in United States and  
45  
46 Europe.<sup>11</sup> The delay in submission by large pharmaceutical companies would mean the  
47  
48 available pediatric data is not readily accessible in Canada. Furthermore, given the  
49  
50 observed paucity of pediatric indications in our studied drugs, it is unclear to what  
51  
52 degree the available pediatric information ultimately reaches the Canadian drug  
53  
54  
55  
56  
57  
58  
59  
60

1  
2  
3 monographs. This delay in the new drug submission is primarily due to Canada being a  
4 small market and the regulatory and reimbursement processes being complex without  
5 any pediatric specific pathways or fee structures. Health Canada does not have any  
6 mandate to solicit pediatric data proactively from a manufacturer and therefore this  
7 creates a gap in the number of pediatric indications included in the product  
8 monographs, as supported by this study. The ability of Health Canada to proactively  
9 require the submission of pediatric data from manufacturers combined with appropriate  
10 incentives would be a significant step to rectifying this situation.  
11  
12  
13  
14  
15  
16  
17  
18  
19  
20

21 Critically ill infants hospitalized in neonatal intensive care units, are exposed to a  
22 large number of medications, the majority of which do not have safety, efficacy and  
23 dosing information and the few available options are known to be impacted by a serious  
24 risk of drug shortage.<sup>16-17</sup> Our results demonstrate that neonates remain pharmaceutical  
25 orphans with less than 5% of all newly approved drugs providing any neonatal  
26 indications, and only one drug providing indications for premature infants. This finding  
27 calls for action as premature infants have the highest number of reported adverse  
28 events among children and almost every pediatric drug development advocacy  
29 document uses the vulnerability of this population as a non-deductive argument in  
30 support of critical need for pediatric drug studies.<sup>18</sup>  
31  
32  
33  
34  
35  
36  
37  
38  
39  
40  
41  
42  
43

44 We have found that 90% of the drugs with oral dosage forms had unmet pediatric  
45 formulation needs. This unmet formulation needs in pediatric patients results in  
46 manipulation of adult pharmaceutical forms for use in children which can cause  
47 medication errors as well as safety and toxicity issues, especially in premature  
48 neonates.<sup>19</sup> Additionally, many adult formulations are not palatable to children. Child-  
49  
50  
51  
52  
53  
54  
55  
56  
57  
58  
59  
60

1  
2  
3 friendly, age-appropriate drug formulation is an essential part of pediatric  
4  
5 pharmacotherapy and the new pediatric regulatory environment in the US and Europe  
6  
7 has resulted in a global collaboration to strengthen its development.  
8  
9

10 The past 20 years have shown the clear advancement of pediatric drug  
11  
12 development worldwide. The United States and Europe's regulatory authorities and the  
13  
14 pharmaceutical industry collaborate closely to ensure appropriate assessment of drug  
15  
16 safety and efficacy in children across all age groups. Furthermore, the significant  
17  
18 advancement in the science of extrapolation and the availability of real-world data have  
19  
20 enhanced the efficiency and feasibility of pediatric drug trials.<sup>20</sup> Canada is currently not  
21  
22 part of this global alignment which, and based on our results, there is a great need for  
23  
24 Canadian children to be at par with children in other developed countries.  
25  
26  
27

28 The American and European governmental initiatives which mandate and  
29  
30 monitor pediatric medicine research, provide a useful framework for Canadian  
31  
32 legislators. As the drug approval process in Canada is primarily industry-driven,  
33  
34 regulatory mandates for pediatric drug development should come into force in order to  
35  
36 increase the data contained in regulatory submissions when use in children is expected.  
37  
38 In addition to a sustained investment for advancement of pediatric medicine research, a  
39  
40 mandate should be given to the Canadian federal research funding agencies to provide  
41  
42 dedicated specific funding, such as what is currently done in the United States and  
43  
44 Europe.  
45  
46  
47  
48

49 This study has some limitations. We were not able to analyze the inclusion of  
50  
51 pediatric data when the product was first submitted to Health Canada as only the most  
52  
53 recent product monographs were available. This however, provided us with the most  
54  
55  
56  
57  
58  
59  
60

1  
2  
3 current available information for Canadian children. A comparison of availability of  
4 pediatric information or indication of the studied drugs in their FDA and EMA labeling  
5 was also not available for the current study. Strengths of this study include broad  
6 inclusion criteria, over a 10-year period which can provide a complete description of  
7 new drug approval in Canada.  
8  
9  
10  
11  
12  
13

## 14 **Conclusion**

15  
16  
17 Newly approved drugs in Canada lack important pediatric drug information and  
18 rarely offer pediatric-friendly dosage formulations, perpetuating “off-Label” drug use in  
19 this vulnerable population. In order to provide Canadian children with safe and effective  
20 drug therapy, Canadian regulatory mechanisms are needed to ensure submission of  
21 pediatric data and formulations by manufacturers when use in children is anticipated.  
22 Such regulations will promote the neonatal and pediatric drug studies and enhance the  
23 inclusion of existing pediatric information in the Canadian drug monographs. All of which  
24 contribute to optimal neonatal and pediatric pharmacotherapy in Canadian children.  
25  
26  
27  
28  
29  
30  
31  
32  
33  
34  
35  
36  
37  
38  
39  
40  
41  
42  
43  
44  
45  
46  
47  
48  
49  
50  
51  
52  
53  
54  
55  
56  
57  
58  
59  
60

## References

1. Turner MA, Catapano M, Hirschfeld S, Giaquinto C. Paediatric drug developments: The impact of evolving regulations. *Adv Drug Deliv Rev.* 2014 Feb 18;2-13.
2. Bucci-Rechtweg C. Enhancing the pediatric drug development framework to deliver better pediatric therapies tomorrow. *Clin Ther.* 2017 Aug 14;39(10):1920-1932.
3. Brown RE. Evaluation of drugs for use in infants and children: Where are we now, and where must we go. *Anesth Analg.* 2019 Mar 7;129(4):1170-1174.
4. One Hundred Fifteenth Congress of the United States of America. [www.congress.gov](http://www.congress.gov). Accessed Jan 7, 2020.
5. Penkov D, Tomasi P, Eichler I, Murphy D, Yao L, Temeck J. Pediatric medicine development. *Ther Innov Regul Sci.* 2017 May 1;51(3):360-371.
6. Tomasi P, Egger G, Pallidis C, Saint-Raymond A. Enabling development of paediatric medicines in Europe: 10 Years of the EU Paediatric Regulation. *Pediatric Drugs.* 2017 Dec;19(6):505-513.
7. Rieder MJ. Drug research and treatment for children in Canada: A challenge. *Paediatr Child Health.* 2011 Nov 1;16(9):560.
8. Denberg AE, Ungar WJ, Greenberg M. Public drug policy for children in Canada. *CMAJ.* 2017 July 31;189(3): E990-E994.
9. European Medicines Agency and its Paediatric Committee. 10-year report to the European Commission: General report on the experience acquired as a result of the application of the Paediatric Regulation. [www.ec.europa.eu/health/sites/health/files/files/paediatrics/2016\\_pc\\_report\\_2017/ema\\_10\\_year\\_report\\_for\\_consultation.pdf](http://www.ec.europa.eu/health/sites/health/files/files/paediatrics/2016_pc_report_2017/ema_10_year_report_for_consultation.pdf). Updated Nov 14 2016. Accessed Jan 7, 2020.
10. Government of Canada. Guidance document: Data protection under C.08.004.1 of the Food and Drug Regulations: 2.8 Pediatric Extension. Health Canada. <https://www.canada.ca/en/health-canada/services/drugs-health-products/drug-products/applications-submissions/guidance-documents/guidance-document-data-protection-under-08-004-1-food-drug-regulations.html#a28>. Updated July 10, 2011. Accessed September 3, 2018.
11. Shajarizadeh A, Hollis A. Delays in the submission of new drugs in Canada. *Can Med Assoc J.* 2015 Jan 6;187(1):E47-E51.
12. Samiee-Zafarghandy S, Mazer-Amirshahi M, van den Anker JN. Trends in pediatric clinical pharmacology data in US pharmaceutical labelling. *Arch Dis Child.* 2014 Jan 1;99(9):862-865.
13. United States Food and Drug Administration. FDA briefing document relevant molecular targets in pediatric cancers: Applicability to pediatric therapeutic investigations required under FDARA 2017. <https://www.fda.gov/media/112230/download>. Published April 20, 2018. Accessed July 10, 2019.
14. Accelerate innovation for children and adolescents with cancer. The US Pediatric Equity Act and Race for Children ACT. ITCC-SIOPE Multistakeholder Paediatric Platform. <https://www.accelerate-platform.org/whyplatform/the-platform/us-pediatric-equity-act-race-children-act/>. Accessed July 10, 2019.

- 1
  - 2
  - 3
  - 4
  - 5
  - 6
  - 7
  - 8
  - 9
  - 10
  - 11
  - 12
  - 13
  - 14
  - 15
  - 16
  - 17
  - 18
  - 19
  - 20
  - 21
  - 22
  - 23
  - 24
  - 25
  - 26
  - 27
  - 28
  - 29
  - 30
  - 31
  - 32
  - 33
  - 34
  - 35
  - 36
  - 37
  - 38
  - 39
  - 40
  - 41
  - 42
  - 43
  - 44
  - 45
  - 46
  - 47
  - 48
  - 49
  - 50
  - 51
  - 52
  - 53
  - 54
  - 55
  - 56
  - 57
  - 58
  - 59
  - 60
15. Calley J, Warris A. Recognition and diagnosis of invasive fungal infections in neonates. *Journal of Infection*. 2017 June;74:S108-S113.
16. Ziesenitz V, Fox E, Zocchi M, Samiee-Zafarghandy S, van den Anker J, Mazer-Amirshahi M. Prescription Drug Shortages: Impact on Neonatal Intensive Care. *Neonatology*. 2018 Nov 1;115(2):108-115.
17. Donnelly KA, Zocchi MS, Katy TA, Fox ER, Pines JM, van den Anker JN, Mazer-Amirshahi ME. Prescription Drug Shortages: Pediatric Emergency and Critical Care Medications. *Pediatr Emerg Care*. 2019 Feb 25. doi: 10.1097/PEC.0000000000001773.
18. Kaushal R. Medication Errors and Adverse Drug Events in Pediatric Inpatients. *JAMA*. 2001 Apr 25;285(16):2114.
19. Ivanovska I, Rademaker CMA, Dijk L, Mantel-Teeuwisse AK. Pediatric drug formulations: A review of challenges and progress. *Pediatrics*. 2014 Aug;134(2)361-372.
20. Gamalo-Siebers M, Hampson L, Kordy K, Weber S, Nelson R, Portman R. Incorporating Innovative Techniques Toward Extrapolation and Efficient Pediatric Drug Development. *Ther Innov Regul Sci*. 2019 May 13;53(5):567-578. doi:10.1177/2168479019842541

**Table 1: Pediatric-specific indication, and child-friendly, age-appropriate oral dosage forms for new drugs by therapeutic drug class.**

| Therapeutic class      | Number of NAS |                             |                        |                                       |                                           |
|------------------------|---------------|-----------------------------|------------------------|---------------------------------------|-------------------------------------------|
|                        | NAS approved  | Pediatric indication (all)* | Non-biologics approved | Pediatric indication (non-biologic)** | Pediatric-friendly oral dosage form(s)*** |
| Oncology               | 54 (20%)      | 4 (7%)                      | 36 (18%)               | 1 (3%)                                | <u>0</u>                                  |
| Infectious Disease     | 38 (14%)      | 18 (47%)                    | 32 (16%)               | 12 (38%)                              | 3 (14%)                                   |
| Hematology             | 28 (10%)      | 11 (39%)                    | 14 (7%)                | 2 (14%)                               | 1 (10%)                                   |
| Endocrine/ Metabolic   | 25 (9%)       | 10 (40%)                    | 18 (9%)                | 5 (28%)                               | 3 (21%)                                   |
| Allergy/ Immunology    | 23 (8%)       | 10 (43%)                    | 9 (4%)                 | 1 (11%)                               | 1 (20%)                                   |
| Cardiology             | 18 (6%)       | 2 (11%)                     | 15 (20%)               | 1 (7%)                                | 1 (7%)                                    |
| Neurology              | 17 (6%)       | 5 (29%)                     | 16 (8%)                | 5 (31%)                               | 3 (23%)                                   |
| Pulmonology            | 15 (5%)       | 5 (33%)                     | 13 (6%)                | 5 (38%)                               | 1 (17%)                                   |
| Gastrointestinal       | 11 (4%)       | 3 (27%)                     | 10 (5%)                | 2 (20%)                               | 1 (13%)                                   |
| Ophthalmology          | 10 (4%)       | 2 (20%)                     | 8 (4%)                 | 2 (25%)                               | <u>0</u>                                  |
| Psychiatry             | 10 (4%)       | 2 (20%)                     | 10 (5%)                | 2 (20%)                               | <u>0</u>                                  |
| Rheumatology           | 8 (3%)        | 1 (13%)                     | 4 (2%)                 | <u>0</u>                              | <u>0</u>                                  |
| Obstetrics/ Gynecology | 5 (2%)        | 1 (20%)                     | 5 (2%)                 | 1 (20%)                               | <u>0</u>                                  |
| Anaesthesia/ Analgesia | 3 (1%)        | <u>0</u>                    | 3 (1%)                 | <u>0</u>                              | <u>0</u>                                  |
| Dermatology            | 3 (1%)        | <u>0</u>                    | 3 (1%)                 | <u>0</u>                              | <u>0</u>                                  |
| Diagnostic imaging     | 3 (1%)        | 1 (33%)                     | 3 (1%)                 | 1 (33%)                               | <u>0</u>                                  |
| Nephrology             | 2 (1%)        | 1 (50%)                     | 2 (1%)                 | 1 (50%)                               | 1 (50%)                                   |
| Urology                | 2 (1%)        | <u>0</u>                    | 2 (1%)                 | <u>0</u>                              | <u>0</u>                                  |
| <b>Total</b>           | <b>275</b>    | <b>76</b>                   | <b>203</b>             | <b>41</b>                             | <b>15</b>                                 |

\*Percentage expressed of all NAS in therapeutic class

\*\*Percentage expressed of all non-biologic NAS in therapeutic class

\*\*\* Percentage expressed of all drugs which were available in oral dosage forms

NAS: New active substances

Table 2: Pediatric drug approval by therapeutic class and age group

| Therapeutic class      | Age group |          |         |            |          |                   | Total | Examples of indications of approved drugs with no pediatric data                                                                                         |
|------------------------|-----------|----------|---------|------------|----------|-------------------|-------|----------------------------------------------------------------------------------------------------------------------------------------------------------|
|                        | 12 – 18 y | 6 – 11 y | 2 – 5 y | 1 mo – 1 y | Neonates | Age not specified |       |                                                                                                                                                          |
| Allergy/ Immunology    | 9         | 8        | 8       | 4          | 0        | 1                 | 10    | Crohn's disease, plaque psoriasis, seasonal allergic rhinitis, systemic lupus erythematosus, ulcerative colitis,                                         |
| Anesthesia/ analgesia  | 0         | 0        | 0       | 0          | 0        | 0                 | 0     | Intensive care unit sedation, severe pain, topical analgesia                                                                                             |
| Cardiology             | 2         | 1        | 0       | 0          | 0        | 0                 | 2     | Arrhythmia, dyslipidemia, hypertension, pulmonary arterial hypertension                                                                                  |
| Dermatology            | 0         | 0        | 0       | 0          | 0        | 0                 | 0     | Actinic keratosis, basal cell carcinoma, eczema, rosacea                                                                                                 |
| Diagnostic Imaging     | 1         | 1        | 1       | 1          | 1        | 0                 | 1     | Hepatic or cardiac vascular imaging                                                                                                                      |
| Endocrine/ Metabolic   | 10        | 10       | 10      | 9          | 4        | 0                 | 10    | Cushing's syndrome, diabetes                                                                                                                             |
| Gastro-intestinal      | 2         | 2        | 2       | 1          | 0        | 0                 | 3     | Chronic idiopathic constipation, opioid-induced constipation, nausea/vomiting,                                                                           |
| Hematology             | 8         | 7        | 7       | 5          | 3        | 3                 | 11    | Anemia, embolism treatment and prevention, hemostasis, stroke prevention, thrombocytopenic purpura, polycythemia vera                                    |
| Infectious Disease     | 17        | 13       | 10      | 8          | 2        | 0                 | 18    | Hepatitis C, human immunodeficiency virus, invasive systemic fungal infections, methicillin-resistant <i>Staphylococcus aureus</i> infections            |
| Nephrology             | 1         | 1        | 0       | 0          | 0        | 0                 | 1     | Hyponatremia                                                                                                                                             |
| Neurology              | 3         | 3        | 2       | 0          | 0        | 1                 | 5     | Parkinson's disease, dementia, partial-onset seizures, restless leg syndrome, relapsing remitting multiple sclerosis, reversal of neuromuscular blockade |
| Obstetrics/ Gynecology | 1         | 0        | 0       | 0          | 0        | 0                 | 1     | Uterine fibroids, vasomotor symptoms associated with menopause                                                                                           |
| Oncology               | 4         | 4        | 3       | 2          | 1        | 0                 | 4     | Acute lymphoblastic leukemia, breast cancer, chronic lymphocytic                                                                                         |



|    |               |   |   |   |   |   |   |                                                                                                                                                                                                                                                                |
|----|---------------|---|---|---|---|---|---|----------------------------------------------------------------------------------------------------------------------------------------------------------------------------------------------------------------------------------------------------------------|
|    |               |   |   |   |   |   |   | leukemia, chronic myelogenous leukemia, colorectal cancer, gastric cancer, hepatocellular carcinoma, leukemia, lymphoma, melanoma, multiple myeloma, non-small-cell lung carcinoma, ovarian cancer, renal cell carcinoma, soft tissue sarcoma, prostate cancer |
|    |               |   |   |   |   |   |   | Actinic keratosis, age-related macular degeneration, ocular pain, open angle glaucoma, postoperative inflammation                                                                                                                                              |
| 15 | Ophthalmology | 2 | 2 | 2 | 1 | 1 | 0 | 2                                                                                                                                                                                                                                                              |
| 18 | Psychiatry    | 2 | 0 | 0 | 0 | 0 | 0 | 2                                                                                                                                                                                                                                                              |
| 22 | Pulmonology   | 5 | 3 | 2 | 0 | 0 | 0 | 5                                                                                                                                                                                                                                                              |
| 26 | Rheumatology  | 1 | 1 | 1 | 0 | 0 | 0 | 1                                                                                                                                                                                                                                                              |
| 29 | Urology       | 0 | 0 | 0 | 0 | 0 | 0 | 0                                                                                                                                                                                                                                                              |

leukemia, chronic myelogenous leukemia, colorectal cancer, gastric cancer, hepatocellular carcinoma, leukemia, lymphoma, melanoma, multiple myeloma, non-small-cell lung carcinoma, ovarian cancer, renal cell carcinoma, soft tissue sarcoma, prostate cancer

Actinic keratosis, age-related macular degeneration, ocular pain, open angle glaucoma, postoperative inflammation

Anxiety, maintenance of alcohol abstinence, antipsychotics, major depressive disorder

Chronic obstructive pulmonary disease, chronic bronchitis, emphysema, asthma, idiopathic pulmonary fibrosis

Gout, psoriatic arthritis, rheumatoid arthritis

Benign prostatic hyperplasia, overactive bladder

**Figure 1: Age-specific pediatric indications for 275 new drugs approved by Health Canada (2007-2016).**

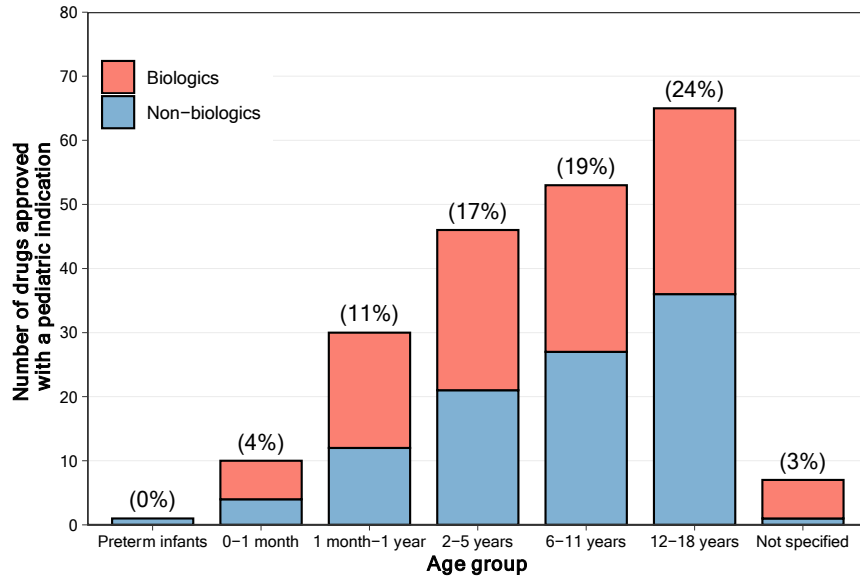

The number in parenthesis shows the percentage of all drugs with a pediatric indication in each age category. Cochran–Armitage test for trend  $p < 0.001$ .

**Figure 2: Percentage of 275 new drugs approved by Health Canada with a pediatric indication (2007-2016).**

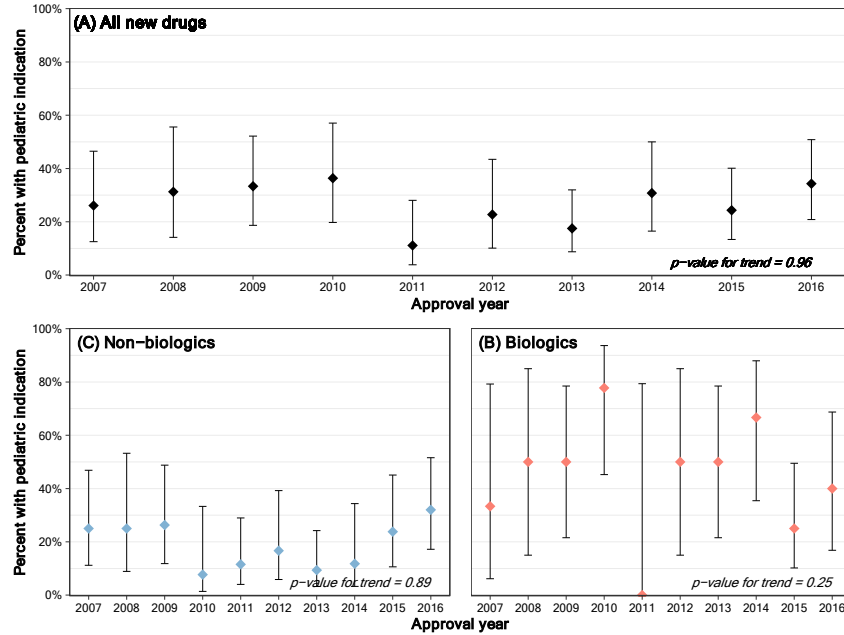

Error bars show the 95% confidence interval for the percentage. P-values from Cochran–Armitage tests for linear trend.
